# Supplementary material for: Enhanced solubilization and extraction of hydrophobic bioactive compounds using water/ionic liquid mixtures
Source: Royal Society of Chemistry journal article supplement (doi:10.1039/c6gc00584e), 2016-01-01
Supplement: c6gc00584e1.pdf [file c6gc00584e1.pdf]

Electronic Supplementary Information (ESI) for

**Enhanced solubilization and extraction of hydrophobic bioactive compounds using water/ionic liquid mixtures**

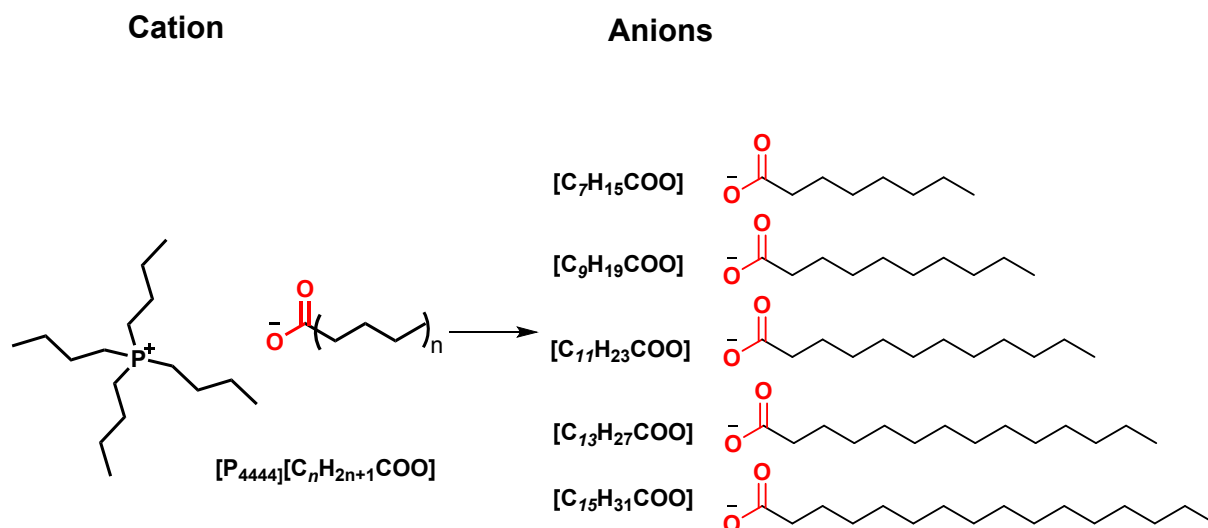

**Fig. S1** Molecular structures of LCC-IL

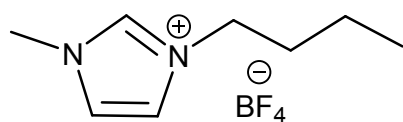

1-butyl-3-methylimidazolium  
tetrafluoroborate  
[BMIm]BF<sub>4</sub>

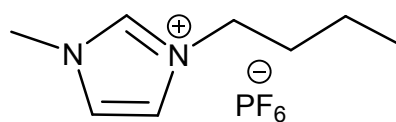

1-butyl-3-methylimidazolium  
hexafluorophosphate  
[BMIm]PF<sub>6</sub>

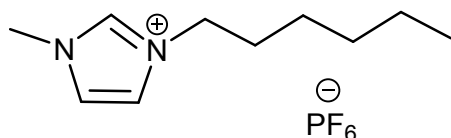

1-hexyl-3-methylimidazolium  
hexafluorophosphate  
[HMIm]PF<sub>6</sub>

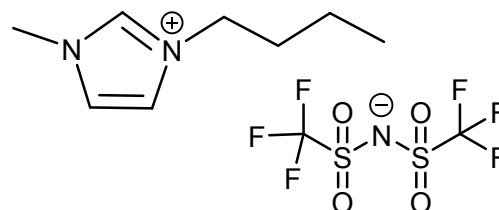

1-butyl-3-methylimidazolium  
bis(trifluoromethylsulfonyl)imide  
[BMIm]Tf<sub>2</sub>N

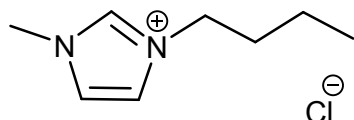

1-butyl-3-methylimidazolium  
chloride  
[BMIm]Cl

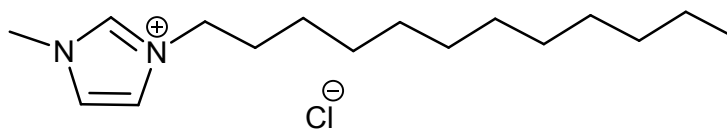

1-dodecyl-3-methylimidazolium  
chloride  
[C<sub>12</sub>MIm]Cl

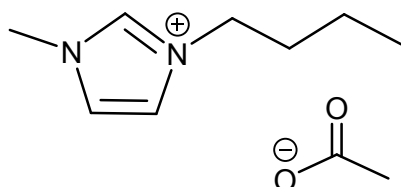

1-butyl-3-methylimidazolium  
acetate  
[BMIm][CH<sub>3</sub>COO]

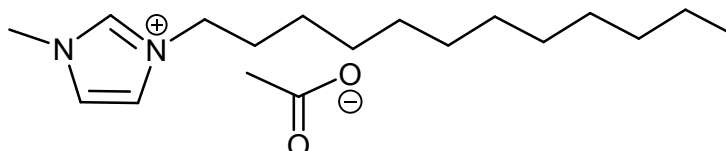

1-dodecyl-3-methylimidazolium  
acetate  
[C<sub>12</sub>MIm][CH<sub>3</sub>COO]

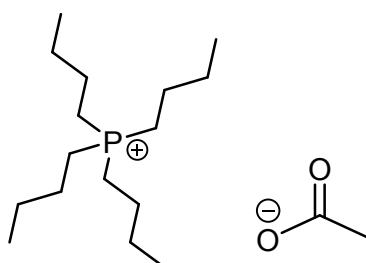

Tetrabutylphosphonium  
acetate  
[P<sub>4444</sub>][CH<sub>3</sub>COO]

**Fig. S2** Structures of other ILs used and the corresponding abbreviations.

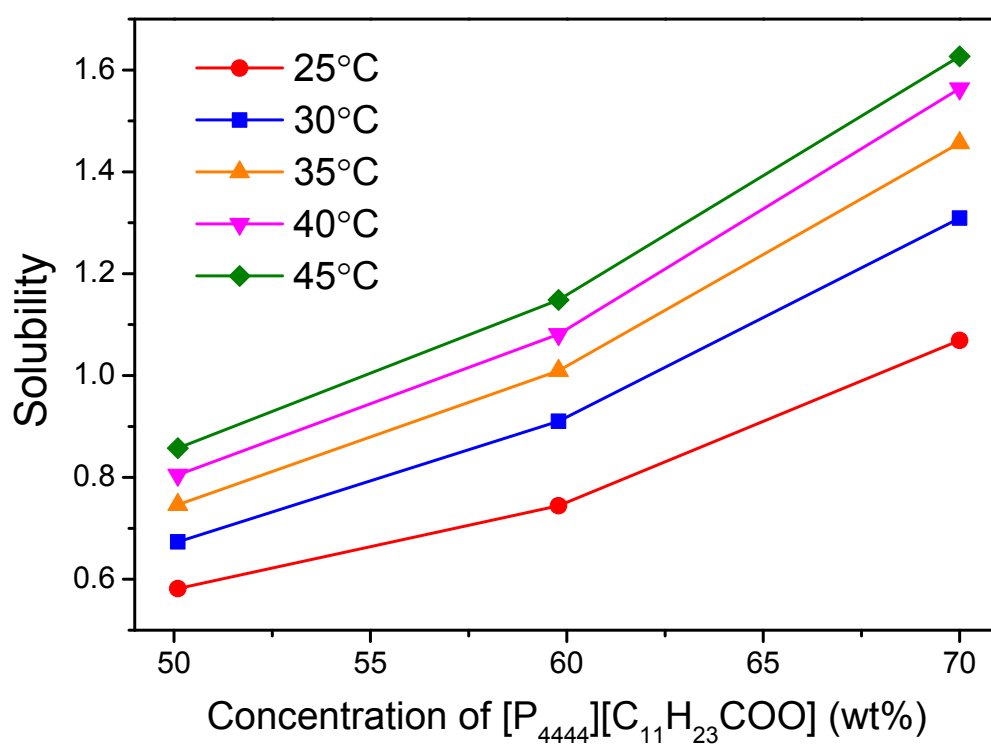

**Fig. S3** Mass solubility of  $\alpha$ -tocopherol in aqueous solutions of  $[P_{4444}][C_{11}H_{23}COO]$  with higher concentration at temperature from 25-45°C.

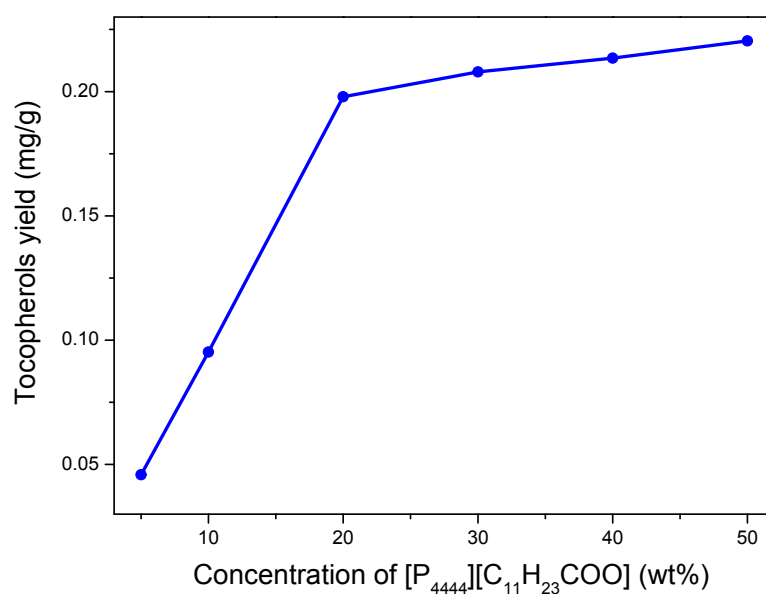

**Fig. S4** Yield of tocopherols extracted from soybean flour ( $T = 40^{\circ}C$ ,  $S/L$  ratio = 1:20,  $t = 2h$ ) in

water/[P<sub>4444</sub>][C<sub>11</sub>H<sub>23</sub>COO] mixtures with IL's concentration from 0.1-1.0M (5 to 50 wt%). The line between points is provided as a guide to the eye.

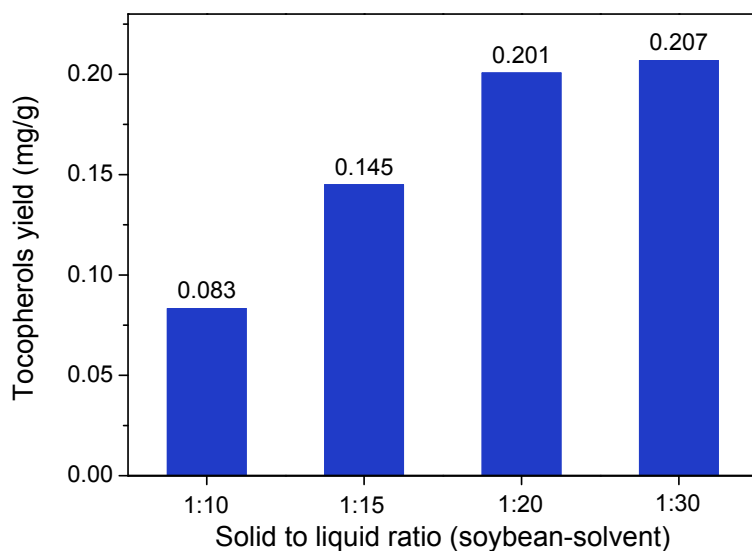

**Fig. S5** Yield of tocopherols extracted from soybean flour ( $T = 40^{\circ}\text{C}$ ,  $x = 20$  wt%,  $t = 2\text{h}$ ) in water/[P<sub>4444</sub>][C<sub>11</sub>H<sub>23</sub>COO] mixtures with solid to liquid ratio from 1:10-1:30.

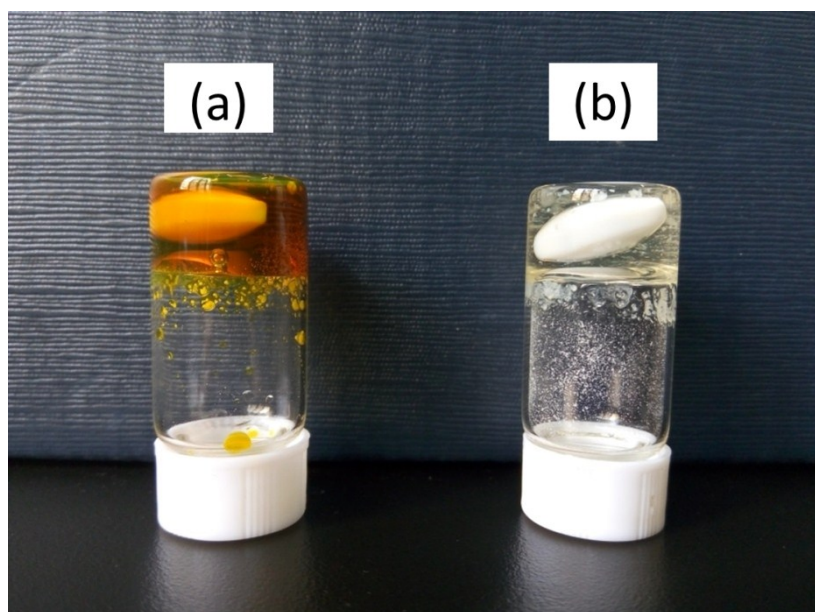

**Fig. S6** Visual depiction of gelation after a certain amount of HBCs dissolving in neat [P<sub>4444</sub>][C<sub>11</sub>H<sub>23</sub>COO]

at 25°C. Photograph of the  $[P_{4444}][C_{11}H_{23}COO]/HBCs$  sample (a) 25% rutin and (b) 30% ginkgolides.
